# Supplementary material for: Humoral and cellular immune responses to CoronaVac assessed up to one year after vaccination
Source: bioRxiv or medRxiv preprint supplement (doi:10.1101/2022.03.16.22272513), 2022-07-07
Supplement: Supplementary file [file media-1.pdf]

## SUPPLEMENTARY APPENDIX

|                                                                                                                              |   |
|------------------------------------------------------------------------------------------------------------------------------|---|
| Activation-induced markers (AIM) T cell assay.....                                                                           | 1 |
| List of Reagents.....                                                                                                        | 2 |
| Figure S1.....                                                                                                               | 3 |
| Table S1. Demographic data of the study's participants.....                                                                  | 7 |
| Table S2. Antibodies and fluorochromes used in the activation induced marker (AIM) assay.....                                | 8 |
| Table S3. Statistical differences on IgG levels against wild-type SARS-CoV-2 and SARS-CoV-2 variants of concern (VOCs) ..... | 9 |

## Activation-induced markers (AIM) T cell assay - full protocol

PBMCs were thawed at 37°C and diluted in RPMI 1640 media (Thermo Scientific, MA, USA) supplemented with 5% human serum (Sigma-Aldrich, Darmstadt, Germany), 2 mM L-glutamine (Gibco, MA, USA), 1 mM penicillin/streptomycin (Gibco, MA, USA), 10 mM HEPES solution (Gibco, MA, USA), 1mM sodium pyruvate (Gibco, MA, USA) and 55 mM β-mercaptoethanol (Gibco, MA, USA) (hereafter referred as HR5). Cells were centrifuged at 1500 rpm for 10 min, resuspended in HR5 containing 50 U/mL benzonase (Merck, Darmstadt, Germany) and incubated at 37°C and 5% CO<sub>2</sub> to remove DNA/RNA aggregates. After incubation, cells were counted, centrifuged at 1500 rpm for 10 min and seeded at a density of 1,5x10<sup>6</sup> cells per well, in U-bottom 96-well plates.

Cells were incubated with 0,5 µg/mL anti-CD40 antibody (Miltenyi Biotec, NRW, Germany) for 15 min at 37°C and 5% CO<sub>2</sub> and then stimulated for 24h at 37°C and 5% CO<sub>2</sub> in the presence of specific MPs (1 µg/mL), phytohemagglutinin (PHA, Sigma-Aldrich, Darmstadt, Germany) (10 µL/mL) as a positive control or dimethyl sulfoxide (DMSO, Sigma-Aldrich, Darmstadt, Germany) (0,1 %) as a negative control, all diluted in HR5. MPs were developed and kindly donated by Dr. Alessandro Sette's laboratory (Center for Infectious Disease and Vaccine Research; La Jolla Institute for Immunology, USA) (Grifoni et al., 2020) and comprehend SARS-CoV-2-specific epitopes specified as CD4-R (remaining non-Spike protein), CD4-S (Spike protein) and CD8-A and CD8-B (viral epitopes compatible with HLA-A and HLA-B, respectively).

After a 24-hours MPs incubation, plates were centrifuged at 1800 rpm for 2 min and the supernatant was collected in a new plate and kept at -80°C freezer for further analysis. Cell pellets were resuspended, transferred to V-bottom 96-well plates and washed with MACS buffer (5 mg/mL bovine serum albumin (BSA, Sigma-Aldrich, Darmstadt, Germany) and 2 mM ethylenediamine tetraacetic acid (EDTA, Sigma-Aldrich, Darmstadt, Germany) diluted in phosphate-buffered saline 1X (PBS, LGC Biotechnologia, SP, Brazil)) twice, then stained with a specific antibodies mix containing characterization and activation markers (Supplementary Appendix) for 20 min, at 4°C in the dark (Moderbacher et al., 2020). After staining, cells were washed twice at the same conditions, fixed with paraformaldehyde (PFA, Sigma-Aldrich, Darmstadt, Germany), diluted 1:10 in PBS 1X, for 10 min at room temperature in the dark, centrifuged at 2000 rpm for 5 min, resuspended in PBS 1X and acquired at the BD LSRFortessa™ X-20 Cell Analyzer (BD Biosciences, CA, USA).

## List of Reagents

1. RPMI 1640 media (Thermo Scientific, MA, USA)
2. 5% human serum (Sigma-Aldrich, Darmstadt, Germany)
3. 2 mM L-glutamine (Gibco, MA, USA)
4. 1 mM penicillin/streptomycin (Gibco, MA, USA)
5. 10 mM HEPES solution (Gibco, MA, USA)
6. 1mM sodium pyruvate (Gibco, MA, USA)
7. 55 mM  $\beta$ -mercaptoethanol (Gibco, MA, USA)
8. 50 U/mL benzonase (Merck, Darmstadt, Germany)
9. Specific SARS-CoV-2 megapools (Center for Infectious Disease and Vaccine Research; La Jolla Institute for Immunology)
10. anti-CD40 antibody (Miltenyi Biotec, NRW, Germany)
11. Phytohemagglutinin (PHA, Sigma-Aldrich, Darmstadt, Germany)
12. Dimethyl sulfoxide) (DMSO, Sigma-Aldrich, Darmstadt, Germany)
13. U-bottom 96-well culture plates (TPP, Trasadingen, Switzerland)
14. MACS buffer:
  - 5 mg/mL bovine serum albumin (BSA, Sigma-Aldrich, Darmstadt, Germany)
  - 2 mM ethylenediamine tetraacetic acid (EDTA, Sigma-Aldrich, Darmstadt, Germany)
  - phosphate-buffered saline 1X (PBS, LGC Biotecnologia, SP, Brazil)
15. Paraformaldehyde (PFA, Sigma-Aldrich, Darmstadt, Germany), diluted 1:10 in PBS 1X
16. V-bottom 96-well plates (NUNC, Thermo Scientific, MA, USA)
17. V-PLEX SARS-CoV-2 Panel 7 IgG kit, catalogue number K15437U-4 (MesoScale Discovery, MD, USA)

A

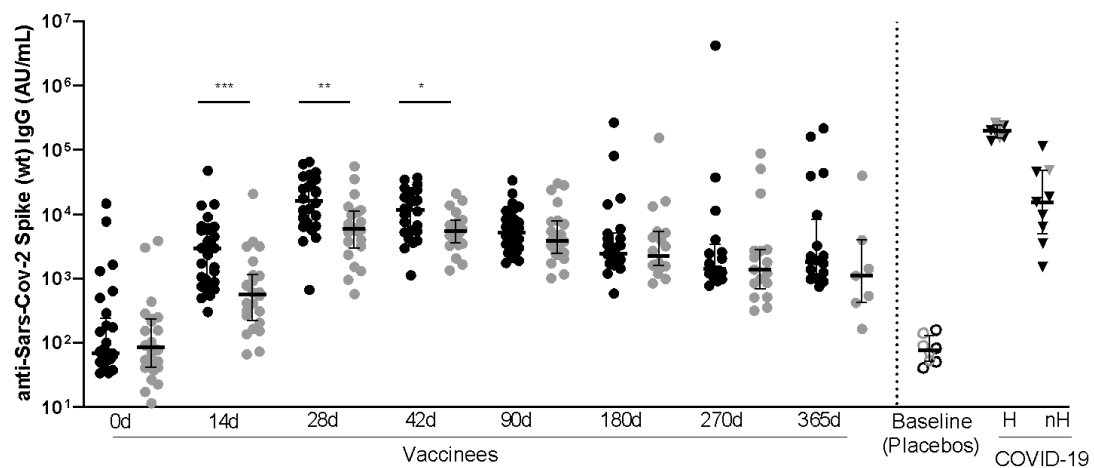

B

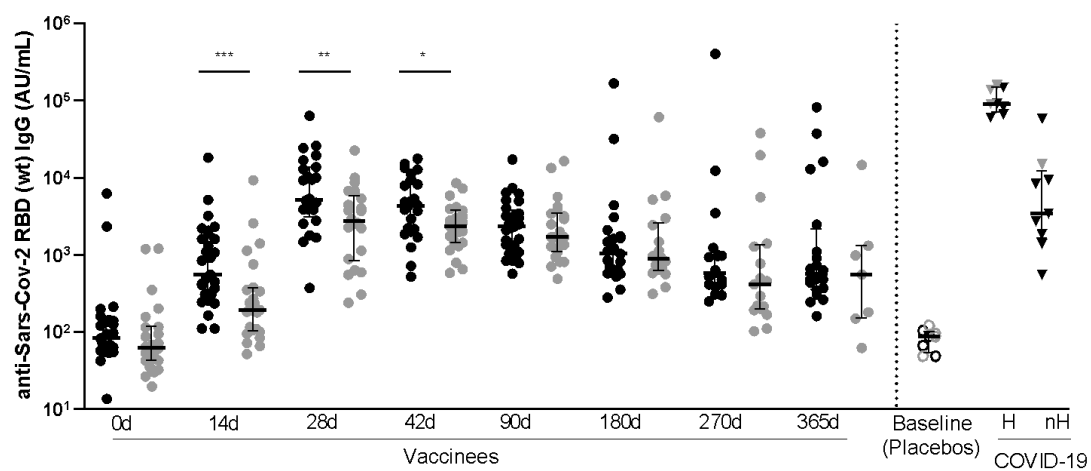

C

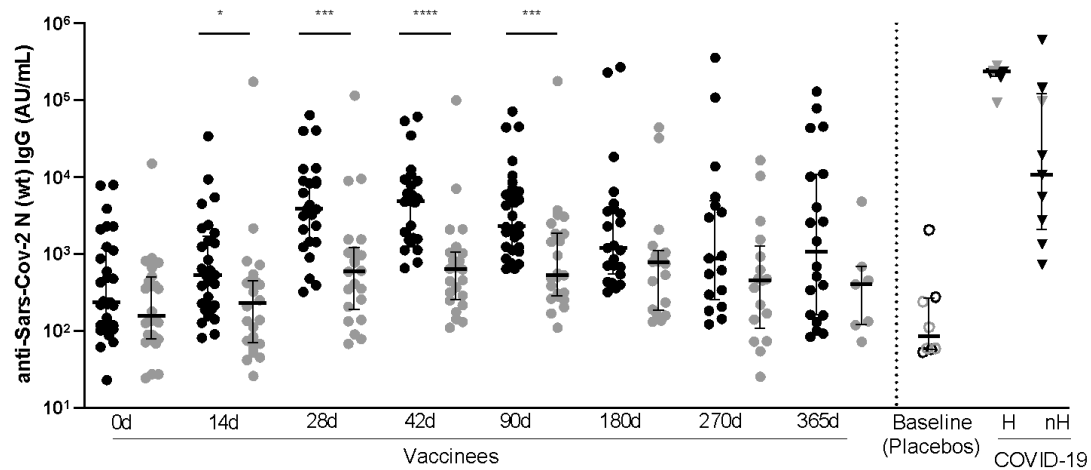

**D**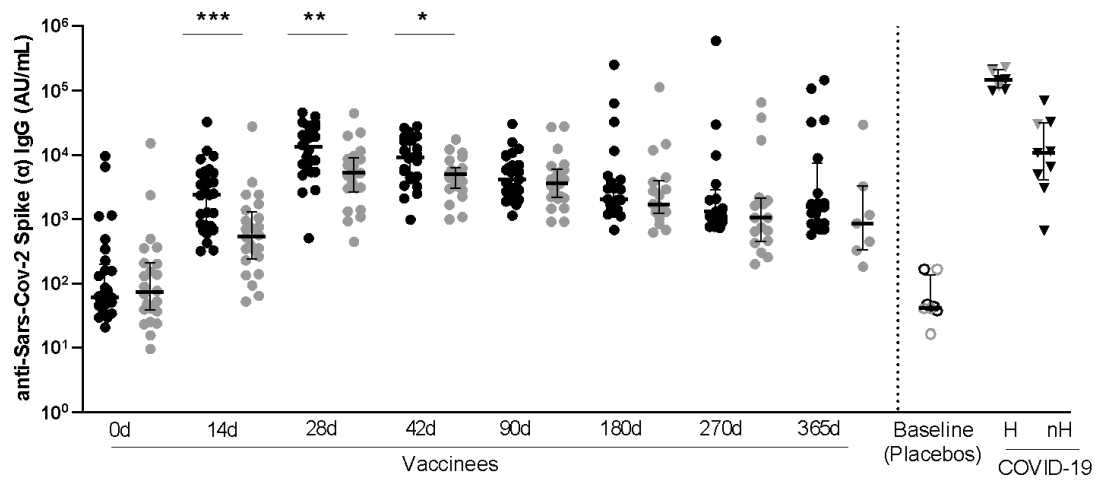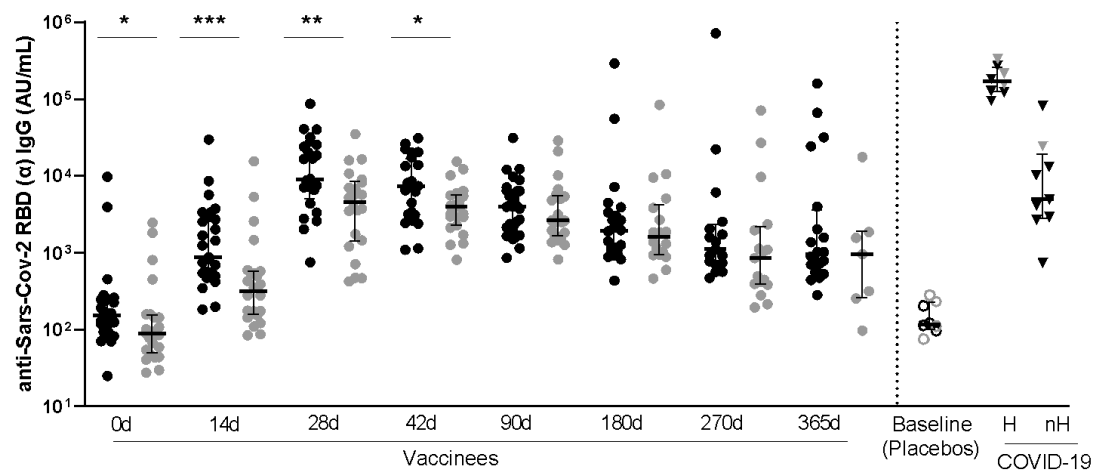**E**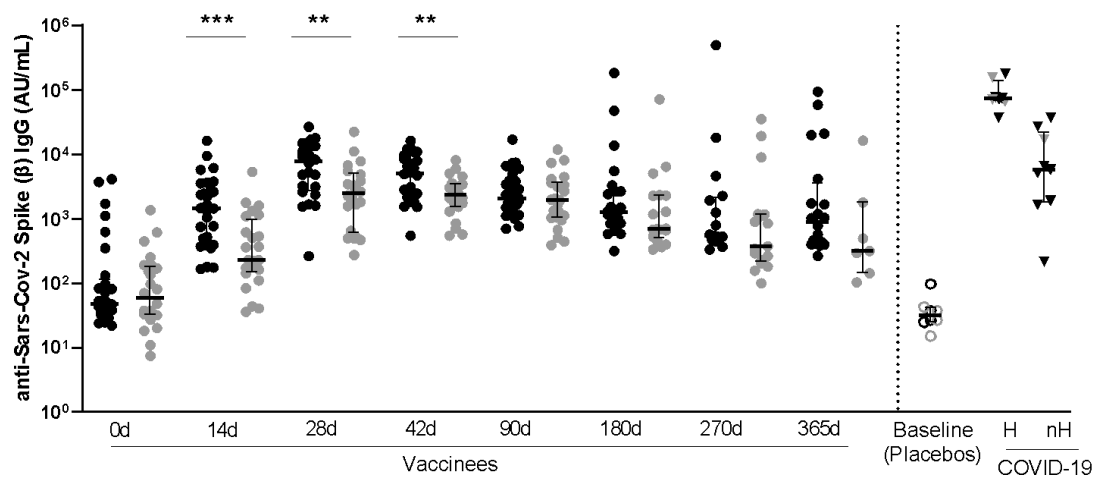

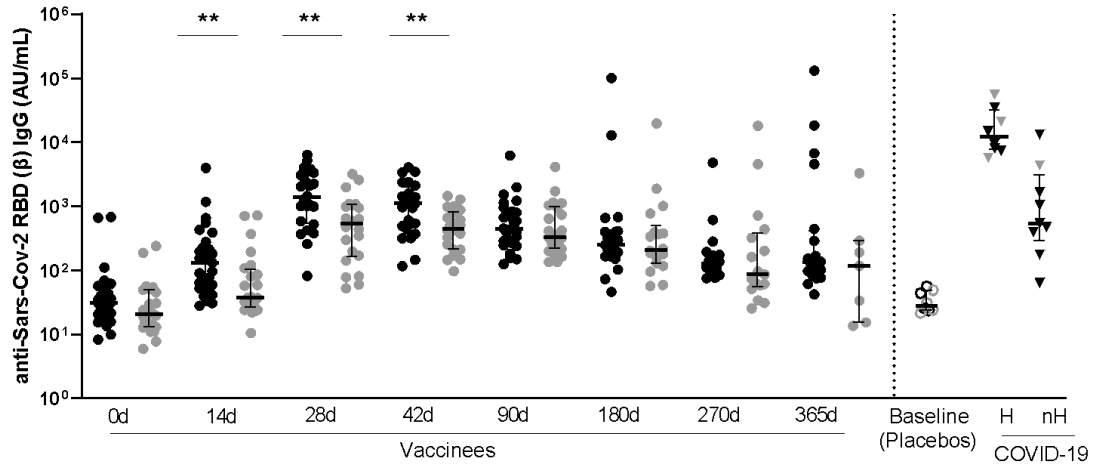

F

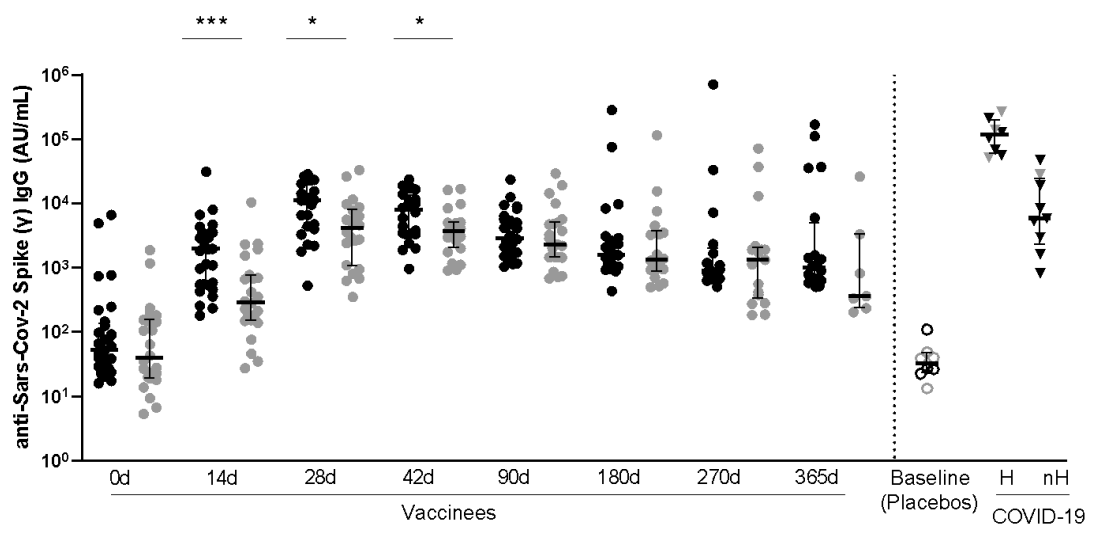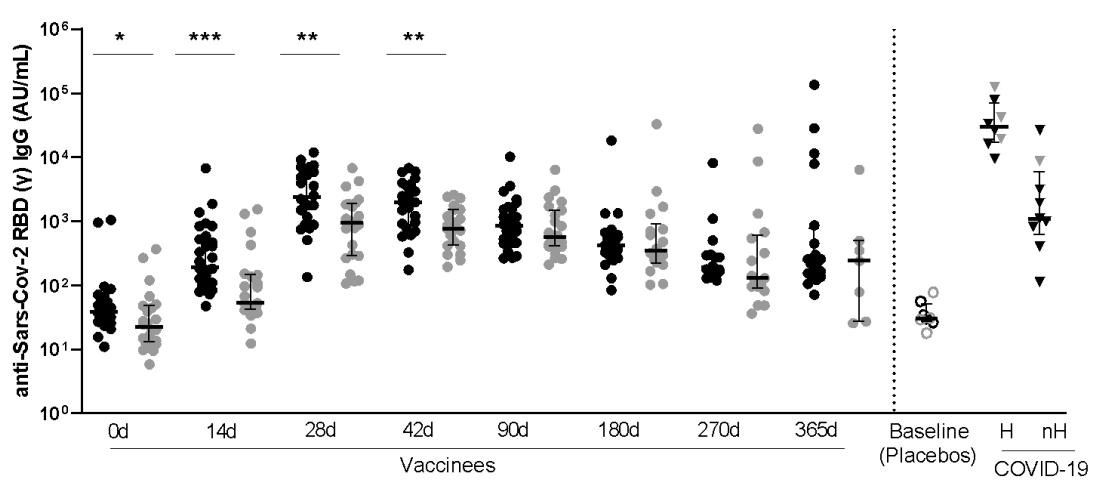

**Figure S1. Specific wt and VOCs SARS-CoV-2 strains IgG titers through one-year follow-up.**

Graphs show anti-SARS-CoV-2 IgG levels in AU/mL from vaccinees throughout one year, and placebos and infected patients as controls. Symbol colours represent age-groups (black: 18-59, grey:  $\geq 60$ ). Symbol shapes represent different volunteer sub-groups (unfilled circle: placebos (n=8), filled circle: vaccinees (n=53), filled triangles: SARS-CoV-2 infected hospitalized 19 days of symptoms onset (median, 17-22 days IQR) (n=6) or non-hospitalized individuals, 46 days of symptoms onset (median, 34-65 days IQR) (n=6)). 0d: vaccinee baseline, day of first vaccine dose. 14d: two-weeks after the first dose, day of the second vaccine dose. Mann-Whitney test was performed to compare both age groups in each visit, and asterisks indicate a statistically significant difference according to the p-value: \* p<0.05, \*\* p<0.01, \*\*\* p<0.001, \*\*\*\* p<0.0001. IgG levels were measured for (A) wild-type Spike protein; (B) wild-type RBD protein; (C) wild-type nucleocapsid protein; (D) Alpha Spike and RBD proteins; (E) Beta Spike and RBD proteins and (F) Gamma Spike and RBD proteins.

**Table S1.** Demographic data of the study's participants.

| <b>Groups</b>                        | <b>Age*</b> | <b>Sex</b>         | <b>Days between vaccine doses*</b> | <b>Days of symptoms onset*</b> | <b>COVID-19 Diagnosis</b> |
|--------------------------------------|-------------|--------------------|------------------------------------|--------------------------------|---------------------------|
| <i>Placebo (n=8)</i>                 | 54 (36-64)  | 62.5% F<br>37.5% M | -                                  | -                              | -                         |
| <i>Vaccinees</i>                     |             |                    |                                    |                                |                           |
| 18-59 (n=29)                         | 36 (31-42)  | 55.2% F<br>44.8% M | 15 (14-18)                         | -                              | -                         |
| ≥60 (n=24)                           | 67 (63-70)  | 33.3% F<br>66.7% M | 16 (14-21)                         | -                              | -                         |
| <i>COVID-19 infected individuals</i> |             |                    |                                    |                                |                           |
| <i>Hospitalized (n=8)</i>            | 53 (43-62)  | 12.5% F<br>87.5% M | -                                  | 19 (17-22)                     | 75% PCR<br>25% Sorology   |
| <i>Non-Hospitalized (n=9)</i>        | 40 (33-44)  | 55.6% F<br>44.4% M | -                                  | 46 (34-65)                     | 100% PCR                  |



**Table S2.** Antibodies and fluorochromes used in the activation induced marker (AIM) assay.

| <b>Fluorochrome</b> | <b>AIM T CD4<sup>+</sup> cells</b> | <b>AIM T CD8<sup>+</sup> cells</b> |
|---------------------|------------------------------------|------------------------------------|
| BB515               | CD3 (UCHT1)                        | CD3 (UCHT1)                        |
| APC-H7              | CD4 (RPA-T4)                       | CD4 (RPA-T4)                       |
| PerCP CY5,5         | CD8 (SK1)                          | CD8 (SK1)                          |
| BV786               | PD1 (EH12.1)                       | -                                  |
| APC                 | CD45RA (HI100)                     | CD45RA (HI100)                     |
| PE-CY7              | CD25 (M-A251)                      | -                                  |
| BV711               | CXCR3 (1C6)                        | CXCR3(1C6)                         |
| BV421               | CCR7 (G043H7)                      | CCR7 (G043H7)                      |
| Alexa Fluor 700     | CD40/CD154 (24-31)                 | -                                  |
| APC-R700            | -                                  | CD38 (HIT2)                        |
| BV510               | CD137 (4B4-1)                      | CD137 (4B4-1)                      |
| BV605               | CXCR5 (RF8B2)                      | -                                  |
| PE                  | OX40 (Ber-ACT35)*                  | CD69 (FN50)                        |
| PE-CF594            | Live-Dead**                        | Live-Dead**                        |

---

\*All antibodies were acquired from BD Biosciences, excepting from anti-OX40 (Biolegend). Clones were described in parenthesis. \*\*Cell viability marker, Live/Dead, CF-594, Life Technologies.

**Table S3.** Statistical differences on IgG levels (AU/ml) against SARS-CoV-2 wt and variants of concern (VOCs), Alpha, Beta and Gamma. First line of each protein target represents statistical differences between each age group (18-59 or  $\geq 60$ ) with respective baseline (0d) measures, and the second line represents statistical differences between both age groups (18-59 and  $\geq 60$ ).

|                | 0d     |           | 14d     |           | 28d     |           | 42d     |           | 90d     |           | 180d    |           | 270d   |           | 365d   |           |
|----------------|--------|-----------|---------|-----------|---------|-----------|---------|-----------|---------|-----------|---------|-----------|--------|-----------|--------|-----------|
|                | 18-59  | $\geq 60$ | 18-59   | $\geq 60$ | 18-59   | $\geq 60$ | 18-59   | $\geq 60$ | 18-59   | $\geq 60$ | 18-59   | $\geq 60$ | 18-59  | $\geq 60$ | 18-59  | $\geq 60$ |
| N              | -      | -         | >0,9999 | >0,9999   | <0,0001 | 0,0756    | <0,0001 | 0,0412    | <0,0001 | 0,0088    | 0,0159  | 0,0383    | 0,1902 | 0,8948    | 0,1004 | >0,9999   |
|                | 0,1675 |           | 0,0101  |           | 0,0003  |           | <0,0001 |           | 0,0002  |           | 0,0562  |           | 0,1061 |           | 0,1984 |           |
| wt Spike       | -      | -         | 0,0004  | 0,2999    | <0,0001 | <0,0001   | <0,0001 | <0,0001   | <0,0001 | <0,0001   | <0,0001 | <0,0001   | 0,0090 | 0,0012    | 0,0010 | 0,1182    |
|                | 0,5979 |           | 0,0002  |           | 0,0047  |           | 0,0157  |           | 0,4208  |           | 0,5239  |           | 0,5177 |           | 0,2404 |           |
| wt RBD         | -      | -         | 0,0015  | 0,3331    | <0,0001 | <0,0001   | <0,0001 | <0,0001   | <0,0001 | <0,0001   | <0,0001 | <0,0001   | 0,0043 | 0,0070    | 0,0008 | 0,1448    |
|                | 0,1102 |           | 0,0007  |           | 0,0095  |           | 0,0211  |           | 0,5463  |           | >0,9999 |           | 0,1816 |           | 0,4980 |           |
| $\alpha$ Spike | -      | -         | 0,0002  | 0,2779    | <0,0001 | <0,0001   | <0,0001 | <0,0001   | <0,0001 | <0,0001   | <0,0001 | <0,0001   | 0,0068 | 0,0074    | 0,0008 | 0,1919    |
|                | 0,7032 |           | 0,0004  |           | 0,0077  |           | 0,0211  |           | 0,4533  |           | 0,3155  |           | 0,1598 |           | 0,1455 |           |
| $\alpha$ RBD   | -      | -         | 0,0018  | 0,3720    | <0,0001 | <0,0001   | <0,0001 | <0,0001   | <0,0001 | <0,0001   | <0,0001 | <0,0001   | 0,0022 | 0,0037    | 0,0008 | 0,1343    |
|                | 0,0188 |           | 0,0002  |           | 0,0047  |           | 0,0188  |           | 0,3600  |           | 0,8455  |           | 0,1705 |           | 0,3998 |           |
| $\beta$ Spike  | -      | -         | 0,0003  | 0,1816    | <0,0001 | <0,0001   | <0,0001 | <0,0001   | <0,0001 | <0,0001   | <0,0001 | <0,0001   | 0,0198 | 0,0043    | 0,0019 | 0,2120    |
|                | 0,7396 |           | 0,0003  |           | 0,0067  |           | 0,0072  |           | 0,2964  |           | 0,1615  |           | 0,1816 |           | 0,1164 |           |
| $\beta$ RBD    | -      | -         | 0,0165  | 0,5523    | <0,0001 | <0,0001   | <0,0001 | <0,0001   | <0,0001 | <0,0001   | <0,0001 | <0,0001   | 0,0253 | 0,0038    | 0,0009 | 0,3004    |
|                | 0,0880 |           | 0,0023  |           | 0,0037  |           | 0,0051  |           | 0,3897  |           | 0,6306  |           | 0,2604 |           | 0,3698 |           |
| $\gamma$ Spike | -      | -         | 0,0002  | 0,1953    | <0,0001 | <0,0001   | <0,0001 | <0,0001   | <0,0001 | <0,0001   | <0,0001 | <0,0001   | 0,0083 | 0,0003    | 0,0011 | 0,0854    |
|                | 0,3795 |           | 0,0002  |           | 0,0150  |           | 0,0298  |           | 0,4315  |           | 0,5585  |           | 0,7857 |           | 0,1036 |           |
| $\gamma$ RBD   | -      | -         | 0,0025  | 0,3257    | <0,0001 | <0,0001   | <0,0001 | <0,0001   | <0,0001 | <0,0001   | <0,0001 | <0,0001   | 0,0205 | 0,0033    | 0,0005 | 0,1286    |
|                | 0,0131 |           | 0,0002  |           | 0,0034  |           | 0,0044  |           | 0,2558  |           | 0,9689  |           | 0,2171 |           | 0,464  |           |

Colours represent statistical difference according to p-value, being grey: no significant, light yellow: \*  $p < 0.05$ , light orange: \*\*  $p < 0.01$ , light red: \*\*\*  $p < 0.001$  and red: \*\*\*\*  $p < 0.0001$ .
